# Supplementary material
Source: PubMed Central journal article supplement (PMC4130237)
Supplement: bm5007823_si_001.pdf [file bm5007823_si_001.pdf]

## Supplementary Information

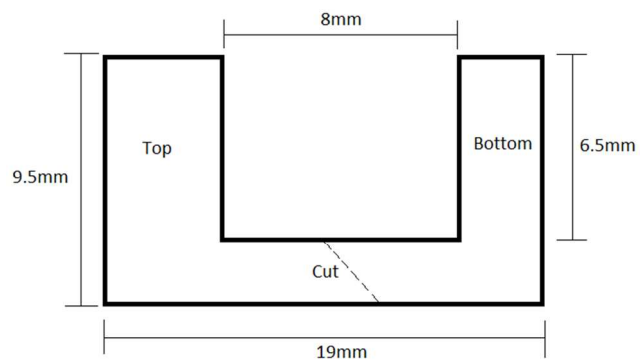

**Figure S1:** Diagram representing a C-card used to load samples for mechanical testing.

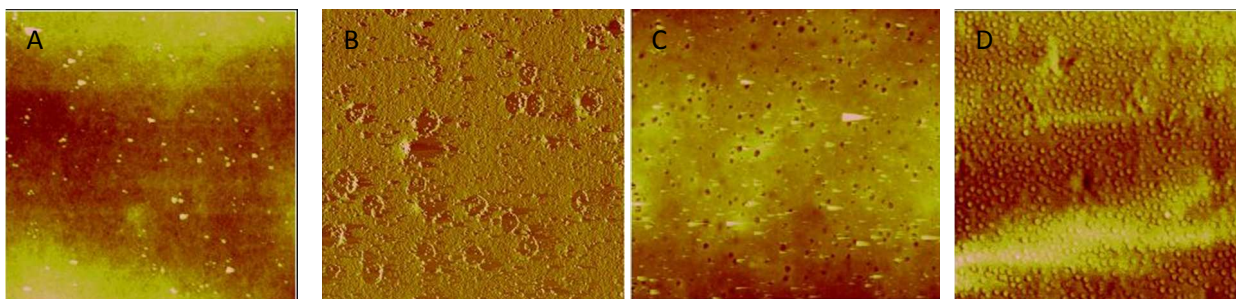

**Figure S2:** AFM images 20 x 20  $\mu\text{m}$  comparing different drying methods of MaSp2. (A) Half sash with FA, (B) Refrigerated with FA, (C) Refrigerated, and (D) Vacuum chamber.

**Table S1:** Comparison of vapor treatments

| Treatments | Average Energy to          | Average Stress | Average Strain |
|------------|----------------------------|----------------|----------------|
|            | Break (MJ/m <sup>3</sup> ) | (MPa)          | (mm/mm)        |
| Cold       | 2.67 ± 1.85                | 65.73 ± 13.99  | 0.058 ± 0.03   |
| IPA        | 1.38 ± 0.51                | 79.61 ± 24.48  | 0.03 ± 0.004   |
| Methanol   | 2.46 ± 1.54                | 46.53 ± 12.23  | 0.097 ± 0.07   |
| Water      | 1.27 ± 0.48                | 67.91 ± 10.74  | 0.031 ± 0.01   |

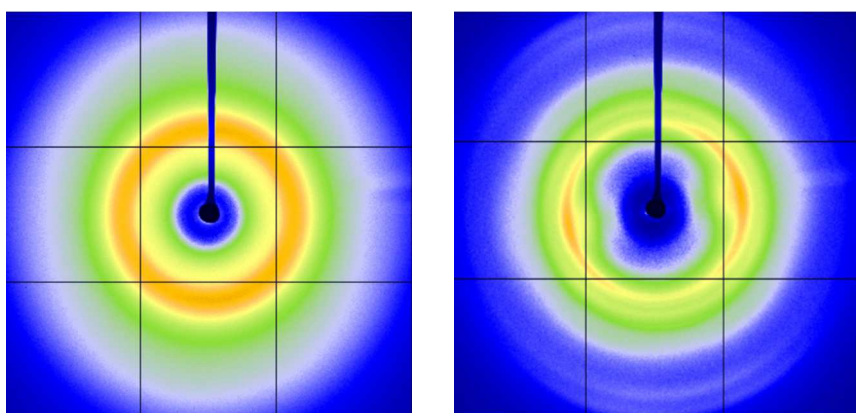

**Figure S3:** XRD images of HFIP-based MaSp1 (left) and MaSp2 (right) films post-pour stretched 2.5 times their original length after an 80/20 Methanol/Water

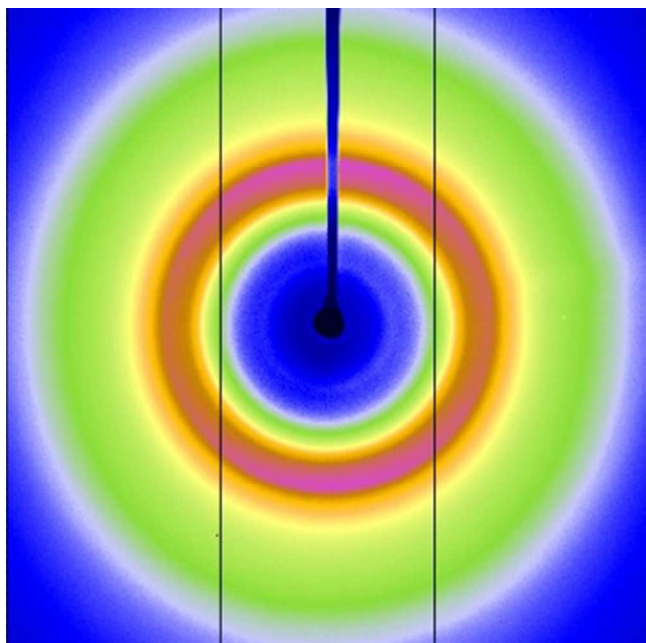

**Figure S4:** 2D WAXD images of water-based as-poured MaSp2 spider silk film.
